# Supplementary material for: Mitochondrial respiration promotes Cdc37-dependent stability of the Cdk1 homolog Cdc28
Source: Oxford University Press journal article supplement (doi:10.1242/jcs.260279), 2023-01-01
Supplement: jcs260279supp.pdf [file jcs260279supp.pdf]

**Fig. S1**

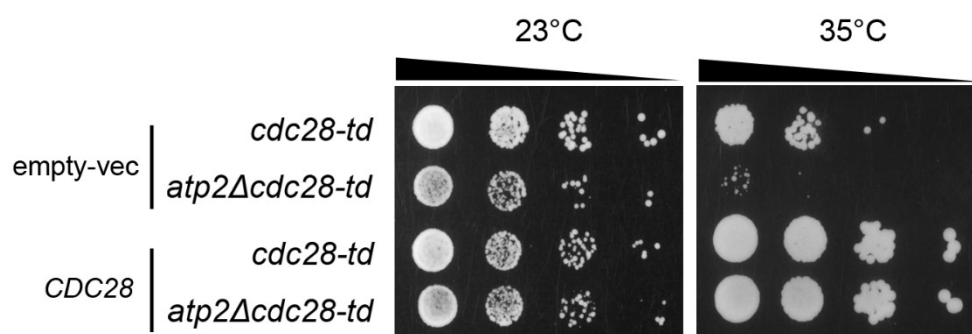

**Fig. S1. Reintroducing wt Cdc28 restored the *atp2Δcdc28td* mutant growth at semi-permissive temperature.** Growth analysis of *cdc28td* and *atp2Δcdc28td* transformed with empty-vector (YCP50) or the YCP50-derived pHLP183 vector (expressing *CDC28* from its natural promoter; a gift from Mark C. Hall (Hall, Jeong et al., 2008)). Cells were spotted in serial dilutions and grown at indicated semi-permissive temperatures. A representative result is shown (n=3).

**Fig. S2**

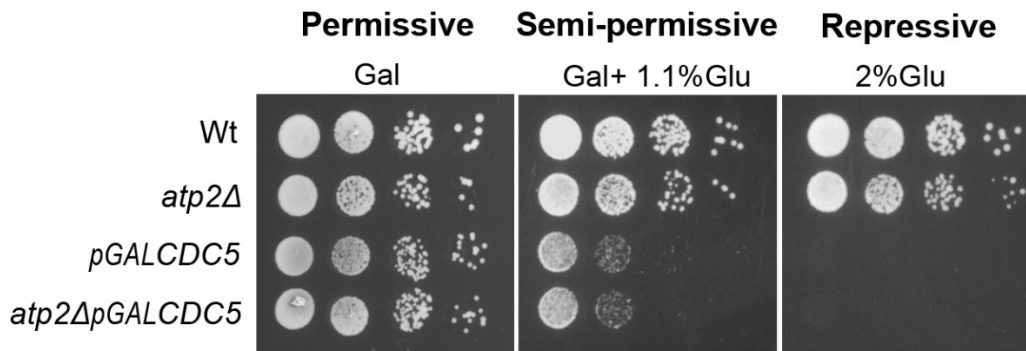

**Fig. S2. *ATP2* does not genetically interact with the polo-like kinase encoding gene *CDC5*.**

Growth analysis of wt, *atp2Δ*, *pGAL1-CDC5* and *atp2ΔpGAL1-CDC5* strains. *CDC5* was placed under the control of *GAL1* promoter and partially or completely downregulated by growing the cells in the presence of the indicated concentrations of glucose. *CDC5* was placed under the control of the *GAL1* promoter by integrating the plasmid pFA6a-KanMX6-PGAL1-3HA into the wt and *atp2Δ* genomes upstream of *CDC5* (Longtine, McKenzie et al., 1998). Cells were spotted in fourfold serial dilutions. A representative image is shown (n=3).

**Fig. S3**

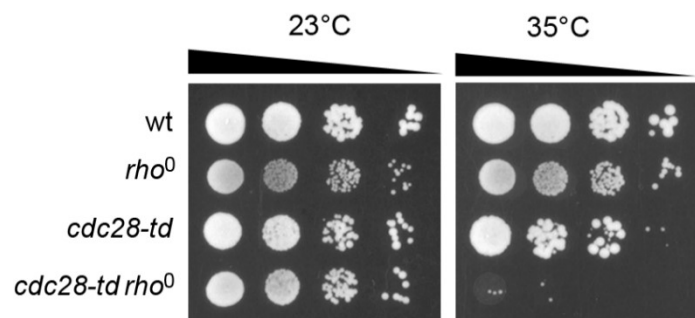

**Fig. S3. Ablating mitochondrial DNA in a strain carrying the *cdc28-td* allele aggravates defective growth at semi-permissive temperature.** Growth analysis of wt, *rho*<sup>0</sup>, *cdc28td* and *rho*<sup>0</sup>*cdc28td* spotted in serial dilutions and grown at permissive and semi-permissive temperatures. A representative result is shown (n=3). To generate *rho*<sup>0</sup> strains, cells were grown to saturation twice in liquid YPD medium plus ethidium bromide (25 μg/ml). Individual colonies were selected for growth defects on YPG plates and loss of mtDNA was confirmed by 4',6-diamidino-2-phenylindole (DAPI) staining.

**Fig. S4**

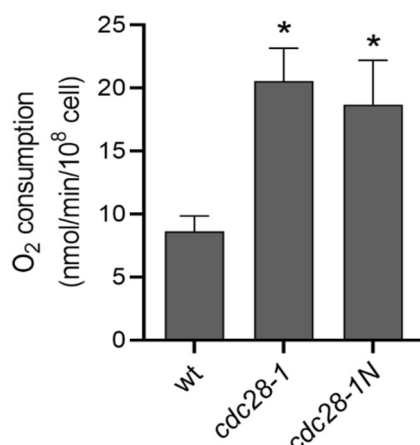

**Fig. S4. Respiratory rate is increased in *cdc28-1* and *cdc28-1N* mutants at restrictive temperature.** The basal respiratory rate was determined by measuring oxygen consumption in whole cells from glucose grown mid-log phase cultures at the restrictive temperature. Values are the mean  $\pm$  SD (n =4); \*, p < 0.05; one-way ANOVA.

**Fig. S5**

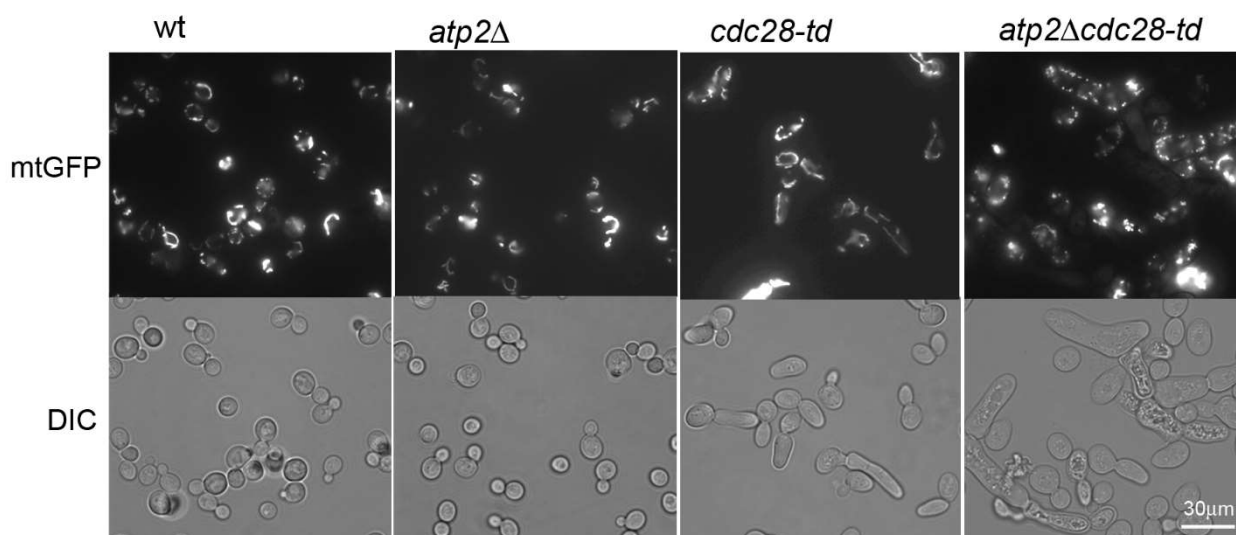

**Fig. S5. Mitochondrial morphology is disrupted in double *atp2Δcdc28-td* strain.** (A) Indicated yeast cells expressing mtGFP were analyzed by fluorescence microscopy. Representative images are DIC merged with maximum intensity projections of z stacks. Images were acquired by epifluorescence in a Zeiss Axio Imager Z1 microscope fitted with Nomarski optics with an AxioCam MR3.0 camera and Axiovision 4.7 software.

**Fig. S6**

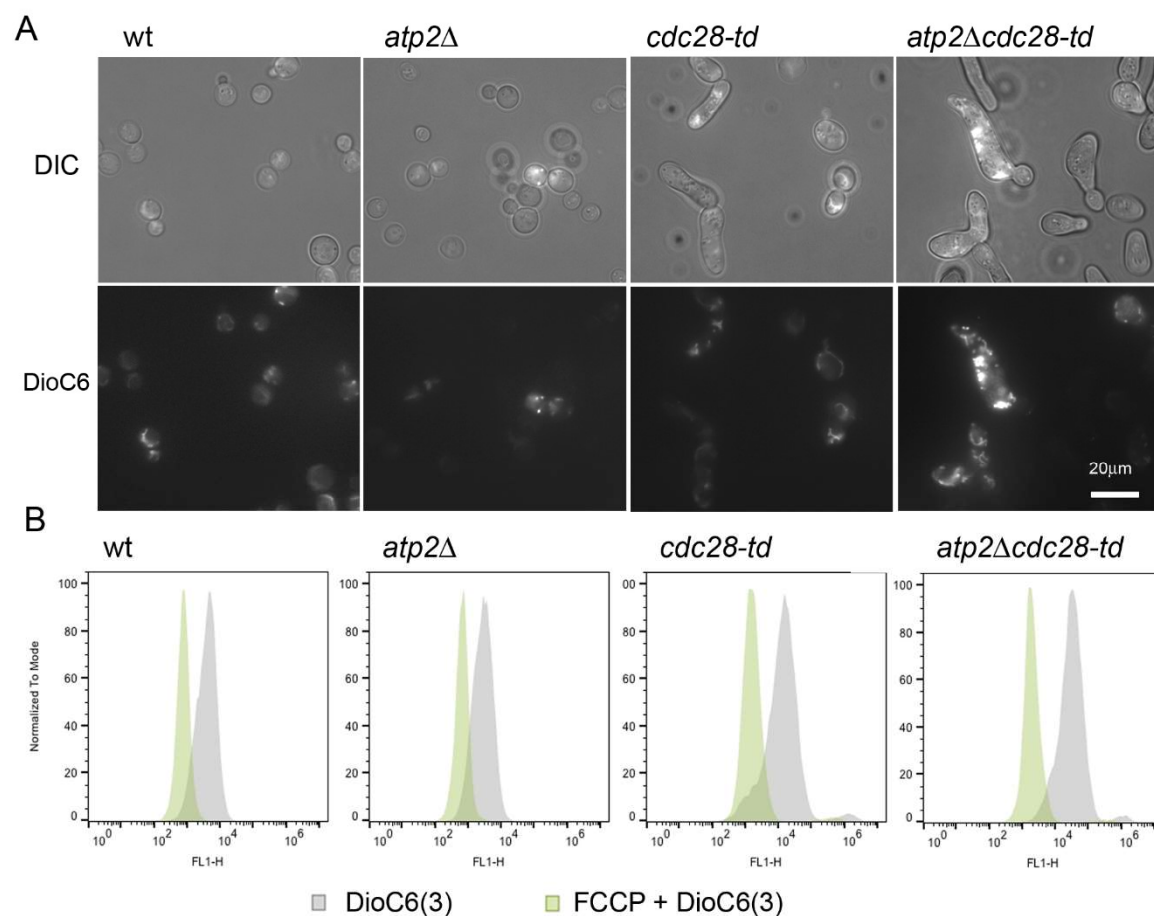

**Fig. S6. Mitochondrial membrane potential is altered in double *atp2Δcdc28-td* mutant.**

(A) The mitochondrial localization of the fluorochrome DioC6(3) was checked by fluorescence microscopy. Representative images are DIC merged with maximum intensity projections of z stacks of DioC6(3) staining. (B) Addition of the FCCP protonophor, which dissipates the  $\Delta\psi_m$ , lead to a substantial reduction of the DiOC<sub>6</sub> uptake for all strains.

**Fig. S7**

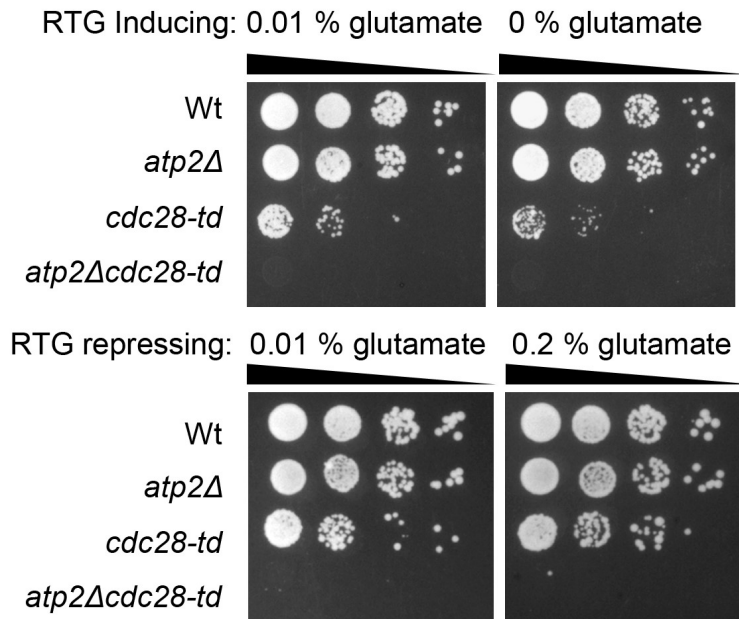

**Fig. S7. Absence or excess of glutamate, a repressor of RTG-dependent gene expression, do not suppress the growth defects of the *atp2Δcdc28-td* strain.** Serial dilutions of indicated strains after growth at the semi-permissive temperature (35 °C) in minimal media containing 0.01% glutamate (control), lacking or containing 0.2% glutamate.

**Fig. S8**

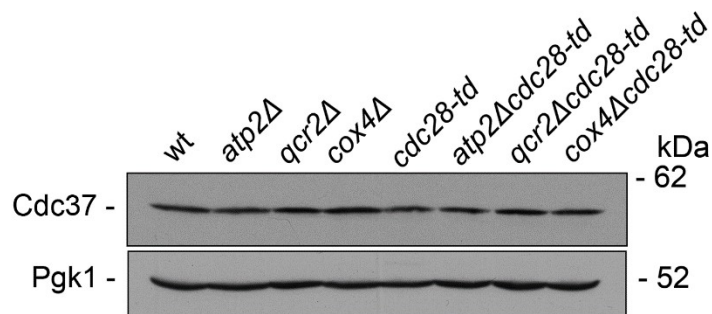

**Fig. S8. Cdc37 levels are unchanged in OXPHOS mutants, single or in combination with *cdc28-td*.** Western blot analysis of Cdc37 steady-state protein levels in indicated strains cultures at semi-permissive temperature of 26 °C. Pgk1 is shown as loading control. A representative blot is shown (n=2).

**Fig. S9**

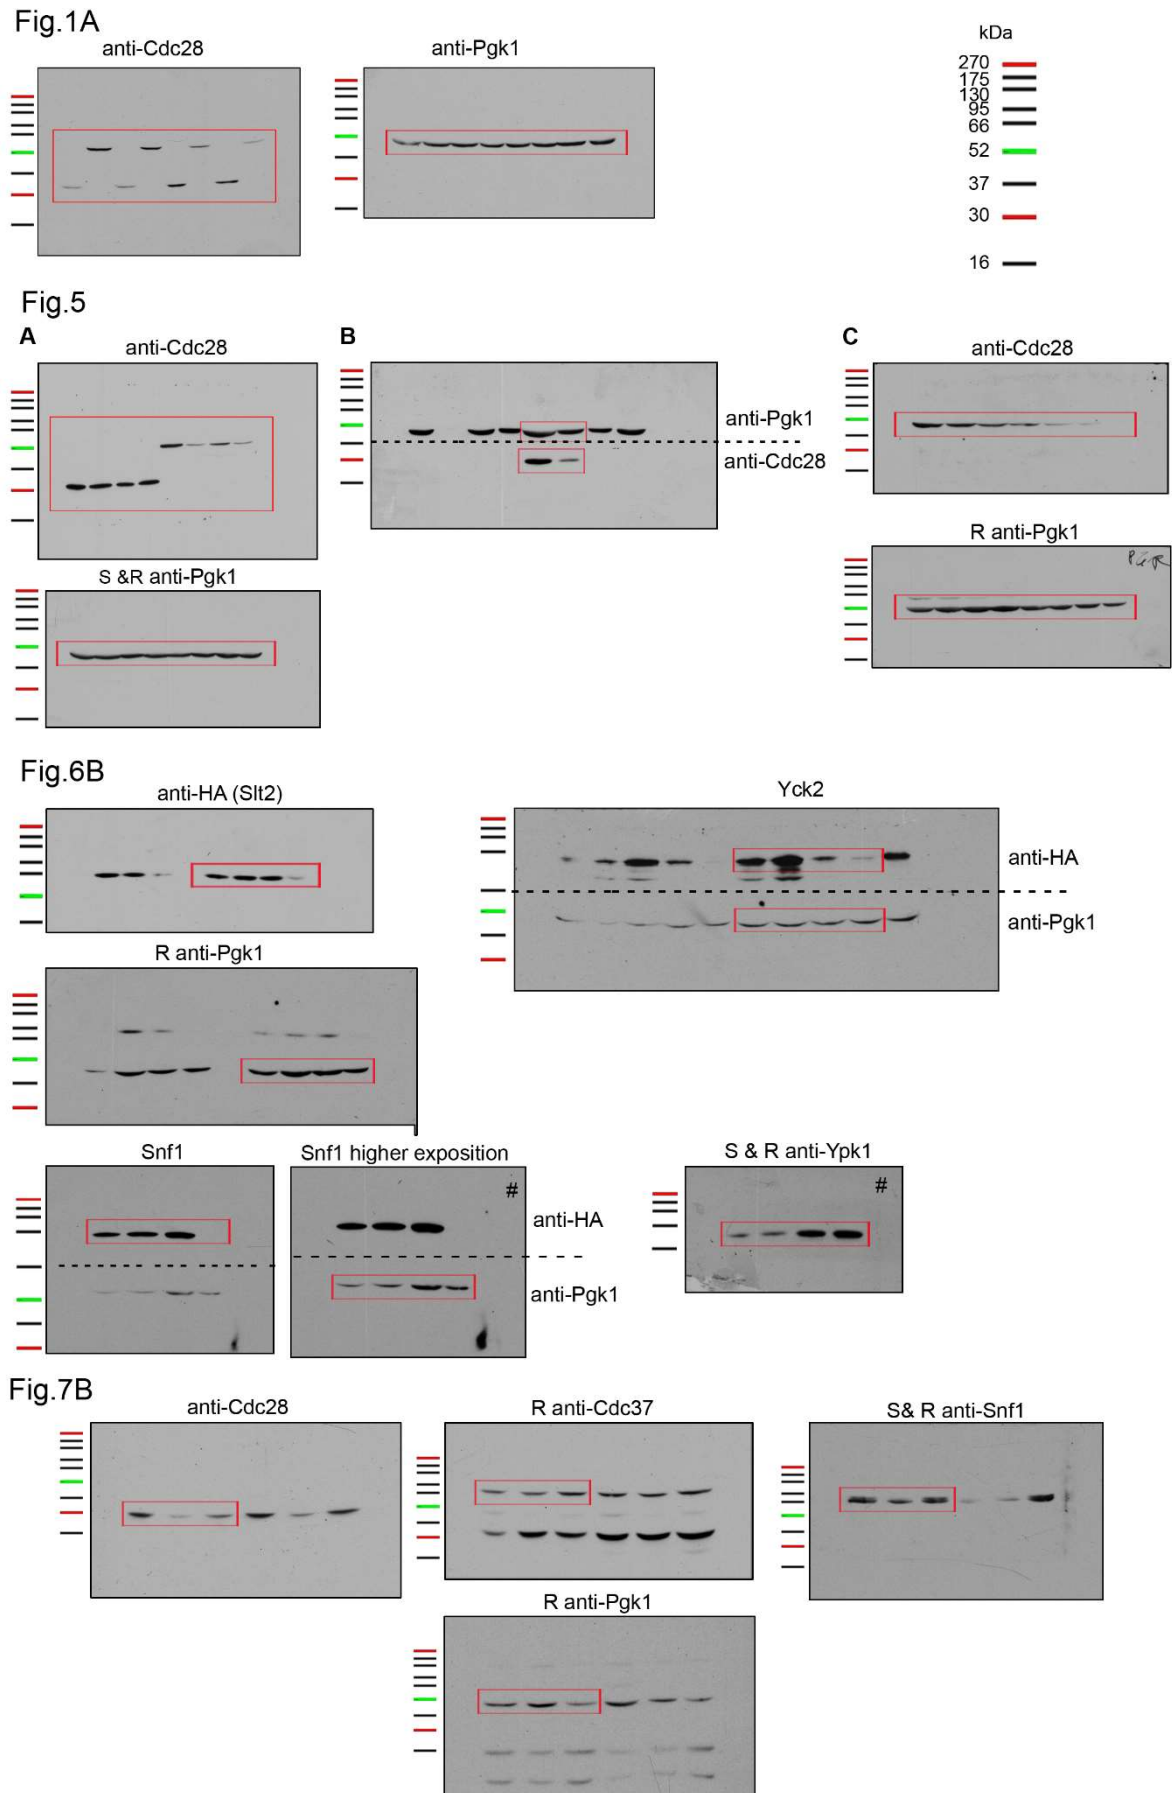

**Fig. S9. Blot transparency.** Full-length western blots with indicated antibodies and molecular weight markers are shown for bands displayed in Figures 1, 5-7. Protein Ladder: GRS Protein Marker MultiColour PLUS. Red rectangles are used to highlight where the bands were taken from. R indicates Reprobing; S & R indicates Stripping before Reprobing. Dotted line indicates where the membranes were cut for antibody incubation and re-aligned for imaging.

## References

- Hall MC, Jeong DE, Henderson JT, Choi E, Bremmer SC, Iliuk AB, Charbonneau H (2008) Cdc28 and Cdc14 control stability of the anaphase-promoting complex inhibitor Acm1. *J Biol Chem* 283: 10396-407
- Longtine MS, McKenzie A, 3rd, Demarini DJ, Shah NG, Wach A, Brachat A, Philippsen P, Pringle JR (1998) Additional modules for versatile and economical PCR-based gene deletion and modification in *Saccharomyces cerevisiae*. *Yeast* 14: 953-61

**Table S1.** *S. cerevisiae* strains used in this study.

| Strain                           | Genotype                                                      | Source         |
|----------------------------------|---------------------------------------------------------------|----------------|
| BY4741                           | Mat <i>a</i> ; <i>his3Δ1 leu2Δ0 met15Δ0 ura3Δ0</i>            | EUROSCARF      |
| <i>atp2Δ</i>                     | BY4741; <i>atp2Δ::HIS3MX6</i>                                 | Lab collection |
| <i>cdc28-td</i>                  | BY4741; <i>cdc28-td::KanMX4</i>                               | EUROSCARF [1]  |
| <i>atp2Δcdc28-td</i>             | BY4741; <i>atp2Δ::HIS3MX6 cdc28-td::KanMX4</i>                | This study     |
| <i>cdc28-1</i>                   | BY4741; <i>cdc28-1::KanMX4</i>                                | EUROSCARF [1]  |
| <i>atp2Δcdc28-1</i>              | BY4741; <i>atp2Δ::HIS3MX6 cdc28-1::KanMX4</i>                 | This study     |
| <i>cdc28-4</i>                   | BY4741; <i>cdc28-4::KanMX4</i>                                | EUROSCARF [1]  |
| <i>atp2Δcdc28-4</i>              | BY4741; <i>atp2Δ::HIS3MX6 cdc28-4::KanMX4</i>                 | This study     |
| <i>cdc28-1N</i>                  | BY4741; <i>cdc28-1N::KanMX4</i>                               | This study     |
| <i>atp2Δcdc28-1N</i>             | BY4741; <i>atp2Δ::HIS3MX6 cdc28-1N::KanMX4</i>                | This study     |
| <i>cox4Δ</i>                     | BY4741; <i>cox4Δ::HIS3MX6</i>                                 | This study     |
| <i>cox4Δcdc28-td</i>             | BY4741; <i>cox4Δ::HIS3MX6 cdc28-td::KanMX4</i>                | This study     |
| <i>qcr2Δ</i>                     | BY4741; <i>qcr2Δ::HIS3MX6</i>                                 | This study     |
| <i>qcr2Δcdc28-td</i>             | BY4741; <i>qcr2Δ::HIS3MX6 cdc28-td::KanMX4</i>                | This study     |
| <i>atp1Δ</i>                     | BY4741; <i>atp1Δ::HIS3MX6</i>                                 | This study     |
| <i>atp1Δcdc28-td</i>             | BY4741; <i>atp1Δ::HIS3MX6 cdc28-td::KanMX4</i>                | This study     |
| <i>atp4Δ</i>                     | BY4741; <i>atp4Δ::HIS3MX6</i>                                 | This study     |
| <i>atp4Δcdc28-td</i>             | BY4741; <i>atp4Δ::HIS3MX6 cdc28-td::KanMX4</i>                | This study     |
| <i>rtg3Δ</i>                     | BY4741; <i>rtg3Δ::URA3MX6</i>                                 | This study     |
| <i>atp2Δrtg3Δcdc28-td</i>        | BY4741; <i>atp2Δ::HIS3MX6 rtg3Δ::URA3MX6 cdc28-td::KanMX4</i> | This study     |
| <i>cdc20-1</i>                   | BY4741; <i>cdc20-1::KanMX4</i>                                | EUROSCARF [1]  |
| <i>atp2Δcdc20-1</i>              | BY4741; <i>atp2Δ::HIS3MX6 cdc20-1::KanMX4</i>                 | This study     |
| <i>ipl1-1</i>                    | BY4741; <i>ipl1-1::KanMX4</i>                                 | EUROSCARF [1]  |
| <i>atp2Δ ipl1-1</i>              | BY4741; <i>atp2Δ::HIS3MX6 ipl1-1::KanMX4</i>                  | This study     |
| <i>rho<sup>0</sup> CIT2-LacZ</i> | BY4741; <i>rho<sup>0</sup> CIT2-LacZ::CIT2</i>                | This study     |
| <i>CIT2-LacZ</i>                 | BY4741; <i>CIT2-LacZ::CIT2</i>                                | This study     |
| <i>cdc28-td CIT2-LacZ</i>        | BY4741; <i>cdc28-td; CIT2-LacZ::CIT2</i>                      | This study     |
| <i>atp2Δcdc28-td CIT2-LacZ</i>   | BY4741; <i>atp2Δcdc28-td; CIT2-LacZ::CIT2</i>                 | This study     |
| <i>cdc28-1 CIT2-LacZ</i>         | BY4741; <i>cdc28-1; CIT2-LacZ::CIT2</i>                       | This study     |
| <i>atp2Δcdc28-1 CIT2-LacZ</i>    | BY4741; <i>atp2Δcdc28-1; CIT2-LacZ::CIT2</i>                  | This study     |
| <i>cdc28-1N CIT2-LacZ</i>        | BY4741; <i>cdc28-1N; CIT2-LacZ::CIT2</i>                      | This study     |
| <i>atp2Δcdc28-1N CIT2-LacZ</i>   | BY4741; <i>atp2Δcdc28-1N; CIT2-LacZ::CIT2</i>                 | This study     |
| DH211                            | TM141 <i>cdc37Δ::HIS3</i> [Ycplac111 CDC37-HA]                | [2]            |
| DH212                            | TM141 <i>cdc37Δ::HIS3</i> [Ycplac111 <i>cdc37-S14A</i> -HA]   | [2]            |

**References**

- [1] Li, Z.J., et al., Nature Biotechnology, 2011. **29**(4): p. 361-U105.  
 [2] Hawle, P., et al., Eukaryotic Cell, 2007. **6**(3): p. 521-532.
